# Supplementary material
Source: Springer Nature journal article supplement (https://www.springermedizin.de/resource/supplementary/12906_2012_1205_MOESM7_ESM.pdf/9520126)
Supplement: MOESM7 [file 9520126]

Table 7 What is considered to be important when selecting Kampo medicine for prescription

| Concerns                                                                 | All (n=200) |      | Palliative care team(n=149) |      | PCU(n=46) |      | p-value | Specialists(n=75) |      | non-specialists(n=125) |      | p-value |
|--------------------------------------------------------------------------|-------------|------|-----------------------------|------|-----------|------|---------|-------------------|------|------------------------|------|---------|
|                                                                          | frequency   | %    | frequency                   | %    | frequency | %    |         | frequency         | %    | frequency              | %    |         |
| Symptom-alleviating effects (alleviation of adverse events)              | 173         | 93.0 | 135                         | 90.6 | 36        | 78.3 | 0.017   | 64                | 85.3 | 109                    | 87.2 | 0.248   |
| Alleviation of symptoms which reduce QOL in the terminal stage of cancer | 162         | 87.6 | 127                         | 85.2 | 34        | 73.9 | 0.003   | 60                | 80.0 | 102                    | 81.6 | 0.647   |
| Low incidence of adverse events                                          | 157         | 84.9 | 122                         | 81.9 | 34        | 73.9 | 0.020   | 62                | 82.7 | 95                     | 76.0 | 0.299   |
| Easy to combine with other drugs                                         | 149         | 80.5 | 117                         | 78.5 | 30        | 65.2 | 0.206   | 57                | 76.0 | 92                     | 73.6 | 1.000   |
| Long-lasting effects                                                     | 124         | 68.1 | 102                         | 68.5 | 21        | 45.7 | 0.009   | 47                | 62.7 | 77                     | 61.6 | 0.871   |
| Scientific evidences                                                     | 114         | 61.6 | 85                          | 57.0 | 27        | 58.7 | 0.938   | 45                | 60.0 | 69                     | 55.2 | 0.641   |
| Cheap drug prices                                                        | 105         | 57.4 | 81                          | 54.4 | 23        | 50.0 | 0.647   | 42                | 56.0 | 63                     | 50.4 | 0.645   |
| Described in the guidelines                                              | 97          | 53.0 | 73                          | 49.0 | 23        | 50.0 | 0.791   | 35                | 46.7 | 62                     | 49.6 | 0.545   |
| Patient's demand                                                         | 95          | 51.9 | 68                          | 45.6 | 25        | 54.3 | 0.439   | 43                | 57.3 | 52                     | 41.6 | 0.049   |
| Efficacy can be investigated with large-scale clinical trials            | 94          | 51.1 | 71                          | 47.7 | 22        | 47.8 | 0.894   | 37                | 49.3 | 57                     | 45.6 | 0.762   |
| Contribute to the accomplishment of chemotherapy                         | 90          | 49.2 | 74                          | 49.7 | 14        | 30.4 | 0.070   | 35                | 46.7 | 55                     | 44.0 | 0.762   |
| Effects manifest itself quickly                                          | 88          | 47.8 | 67                          | 45.0 | 20        | 43.5 | 0.946   | 36                | 48.0 | 52                     | 41.6 | 0.548   |

\*Multiple answers allowed
